# Supplementary material for: Photocatalysis of C, N-doped ZnO derived from ZIF-8 for dye degradation and water oxidation
Source: Royal Society of Chemistry journal article supplement (doi:10.1039/c6ra20667k), 2016-01-01
Supplement: c6ra20667k1.pdf [file c6ra20667k1.pdf]

**Electronic Supplementary Information for**  
**Photocatalysis of C, N-doped ZnO derived from ZIF-8 for dye**  
**degradation and water oxidation**

Ping Liang<sup>a</sup>, Chi Zhang<sup>a</sup>, Hongqi Sun<sup>b,\*</sup>, Shaomin Liu<sup>a</sup>, Moses Tade<sup>a</sup>, and Shaobin Wang<sup>a,\*</sup>

<sup>a</sup> Department of Chemical Engineering, Curtin University, GPO Box U1987, WA 6845, Australia

<sup>b</sup> School of Engineering, Edith Cowan University, 270 Joondalup Drive, Joondalup, WA 6027, Australia

\*Corresponding Authors

Email: [Shaobin.wang@curtin.edu.au](mailto:Shaobin.wang@curtin.edu.au) (S. Wang), [h.sun@ecu.edu.au](mailto:h.sun@ecu.edu.au) (H. Sun)

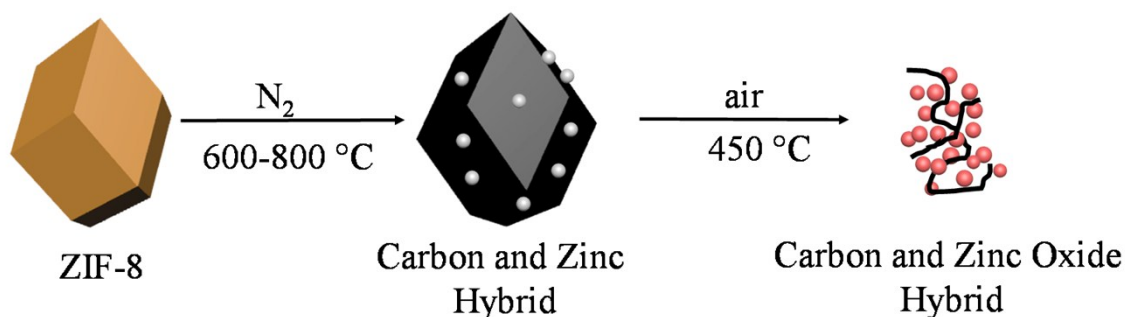

**Scheme S1.** The synthesis route of the samples

**Table S1.** Carbon and nitrogen contents of the samples obtained from EDX analysis.

| samples  | 6C25 | 7C25 | 8C25  | 6C20 | 6C30 | 6C40 |
|----------|------|------|-------|------|------|------|
| C (wt.%) | 2.71 | 4.48 | 12.66 | 4.01 | 0.93 | 0.66 |
| N (wt.%) | 0.57 | 1.47 | 4.02  | 1.16 | 0.35 | 0.14 |

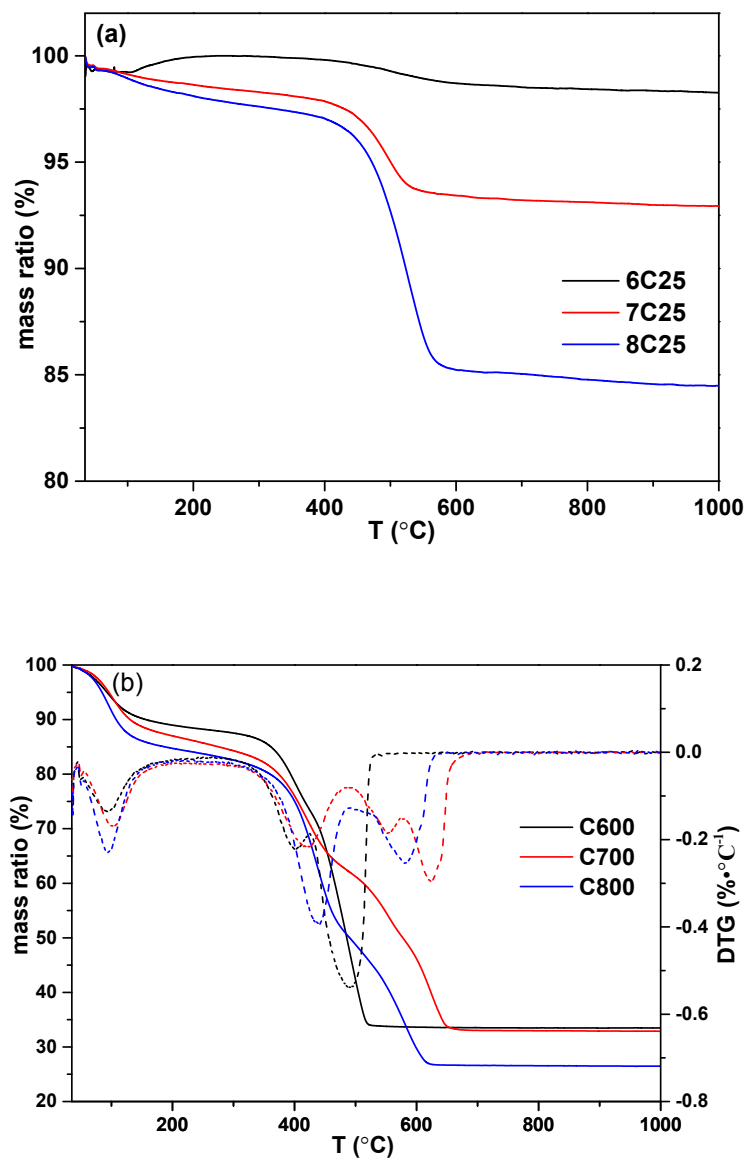

**Figure S1.** TGA of 6C25, 7C25 and 8C25 in air (a) and TGA/DTG of C600, C700 and C800 in air (b).

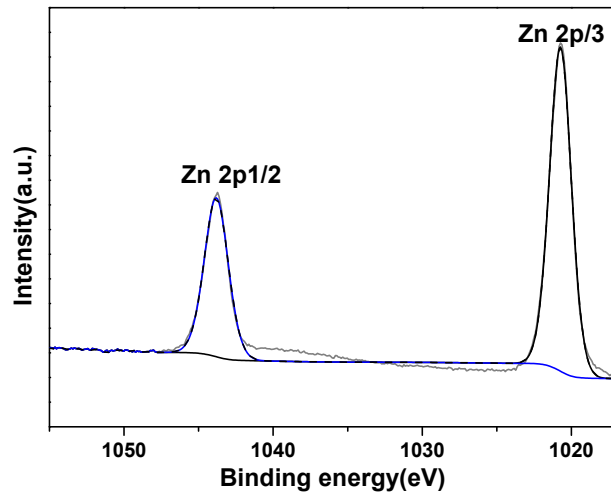

**Figure S2.** The high-resolution Zn 2p spectra of 6C25.

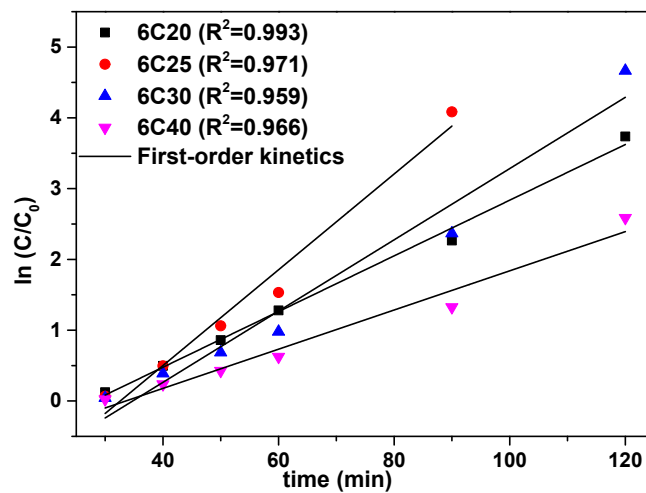

**Figure S3.** First-order kinetic rates of 6C20, 6C25, 6C30 and 6C40.

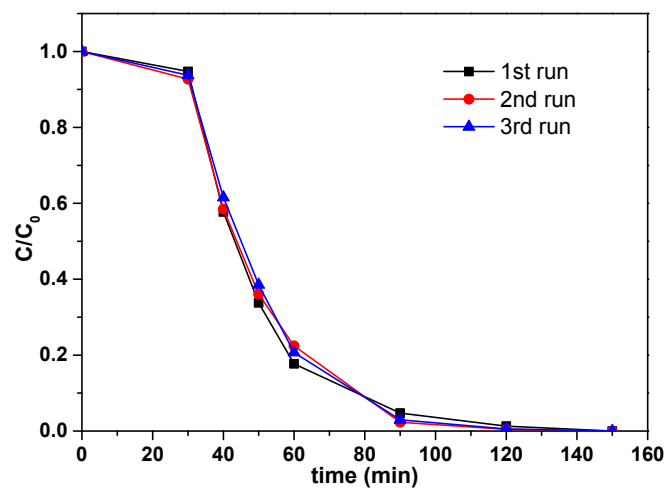

**Figure S4.** Stability of 6C25.
